# Supplementary material for: Identification of RNA: 5-Methylcytosine Methyltransferases-Related Signature for Predicting Prognosis in Glioma
Source: PubMed Central journal article supplement (PMC7466433; doi:10.3389/fonc.2020.01119), 2020-08-19
Supplement: Data_Sheet_1.pdf [file Data_Sheet_1.pdf]

## Supplementary Material

### 1 Supplementary Data

None

### 2 Supplementary Figures and Tables

#### 2.1 Supplementary Figures

**Supplementary Figure S1.** The genetic alteration and differential expression of RNA:m<sup>5</sup>C methyltransferases. **(A-B)** The differential expression of seven RNA:m<sup>5</sup>C methyltransferases with different IDH-mutant status in glioblastoma. **(C)** The gene mutation frequencies of seven RNA:m<sup>5</sup>C methyltransferases.

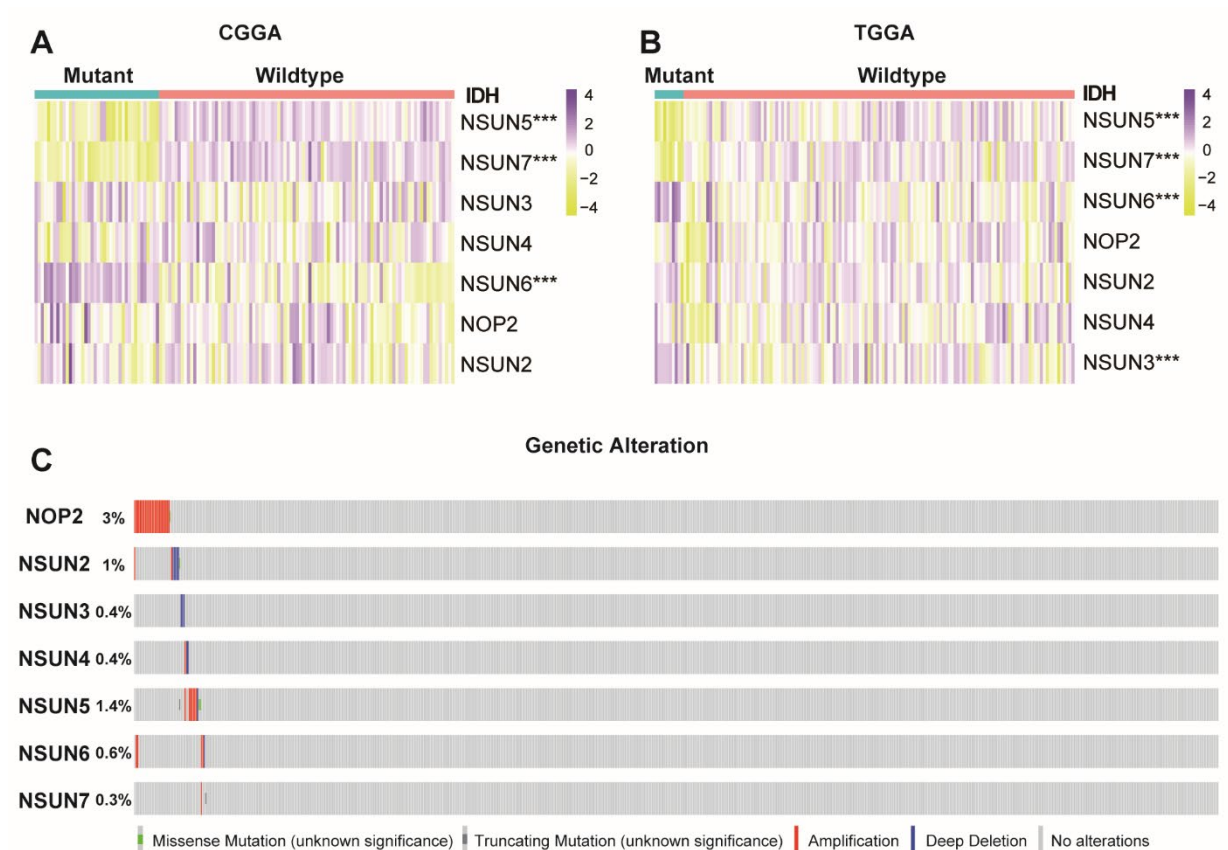

**Supplementary Figure S2.** Pearson correlation and unsupervised consensus analysis of selected RNA:m<sup>5</sup>C methyltransferases. **(A)** Pearson correlation analysis of seven RNA:m<sup>5</sup>C methyltransferase expression profiles in the TCGA dataset. **(B-C)** Consensus clustering cumulative distribution function for k=2 to 9. Relative change in area under CDF for k=2 to 9. **(D-E)** Consensus clustering matrix for k=2 and k=4.

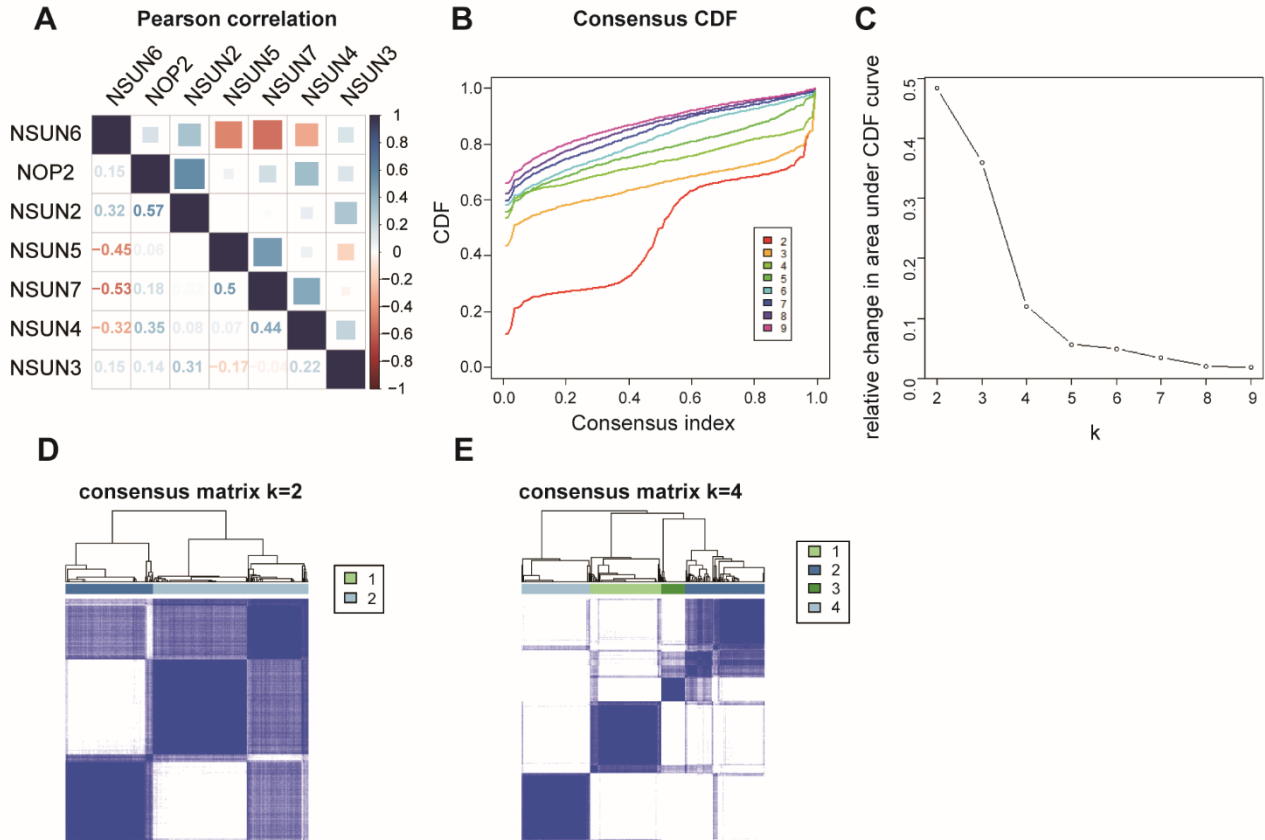

**Supplementary Figure S3.** Kaplan-Meier overall survival curves for patients in the TCGA dataset. (A) Kaplan-Meier overall survival curves for each prognostic gene in the TCGA dataset. (B-C), Kaplan-Meier overall survival curves for patients in the TCGA dataset stratified by WHO grade. (D-E) Kaplan-Meier overall survival curves for patients in the TCGA dataset stratified by IDH-mutant status.

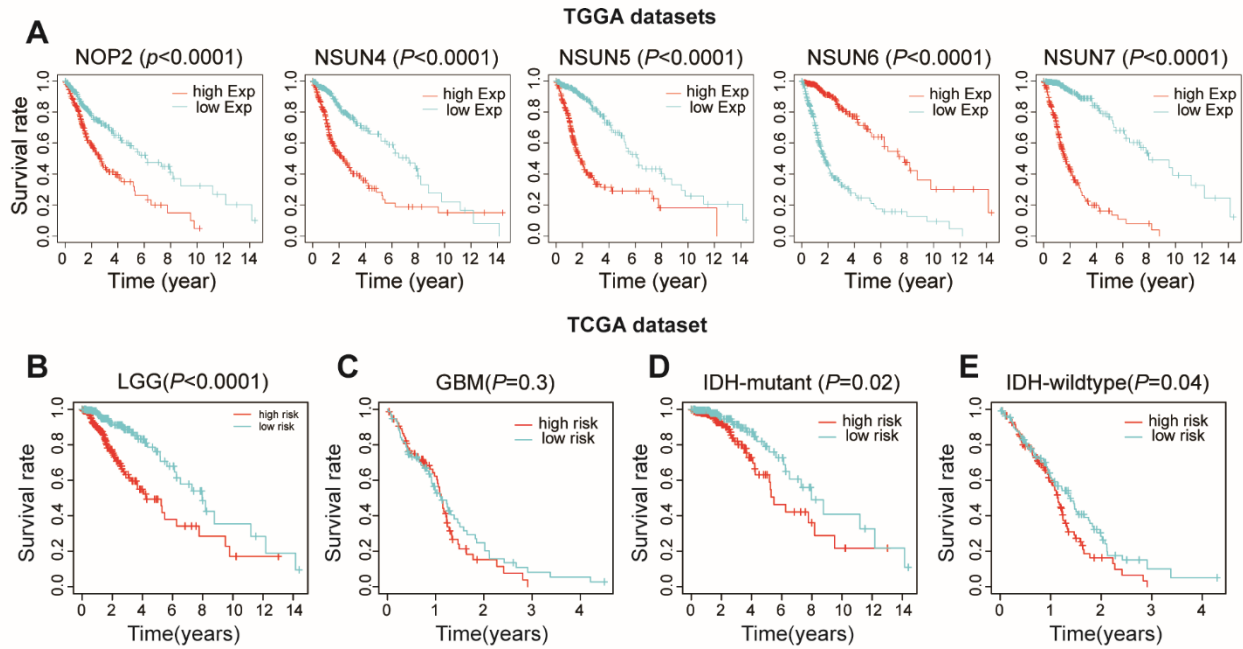

**Supplementary Figure S4. A-G,** The relationship between the risk scores and each clinicopathological characteristic in TCGA dataset.

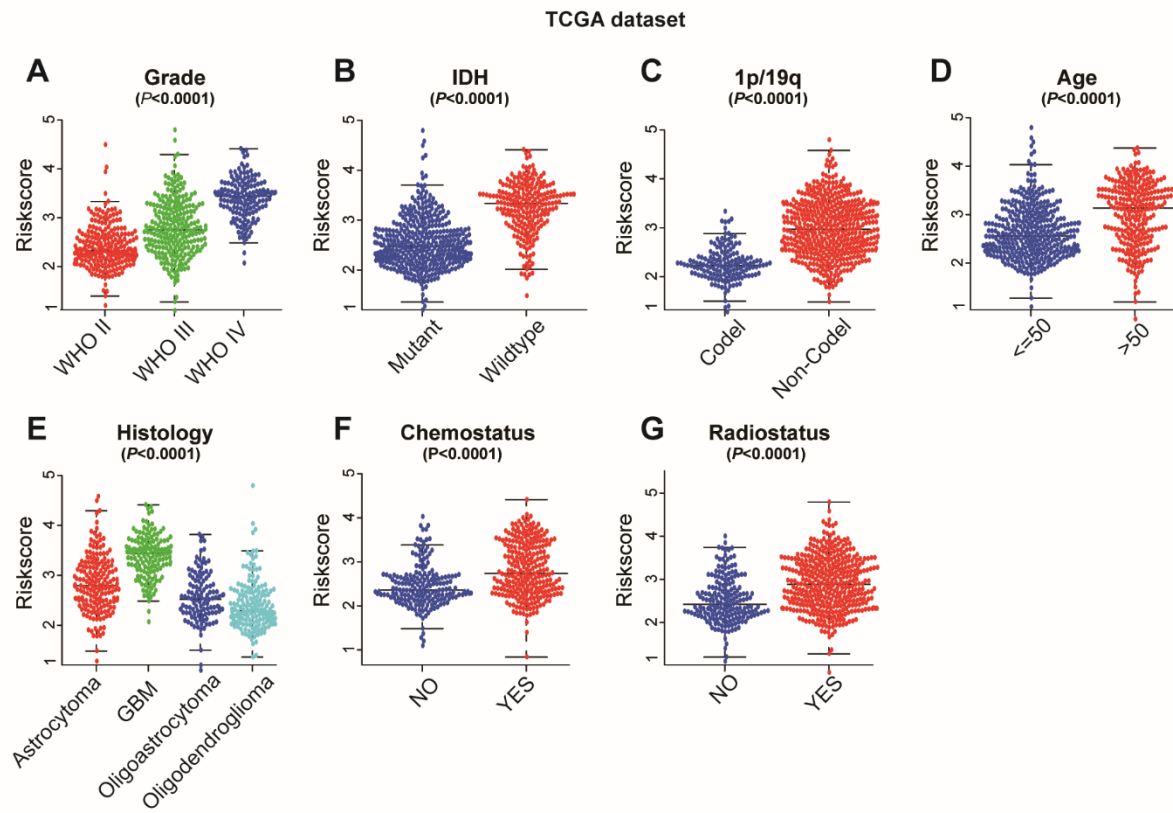

## 2.2 Supplementary Tables

**Supplementary Table S1.** The clinicopathological information of glioma patients in the CGGA and the TCGA datasets.

| Characteristics       |                   | CGGA dataset | TCGA dataset |
|-----------------------|-------------------|--------------|--------------|
| <b>Total patients</b> |                   | 306          | 616          |
| <b>Gender</b>         | Female            | 117          | 261          |
|                       | Male              | 189          | 355          |
| <b>Age</b>            | >50               | 85           | 260          |
|                       | <=50              | 221          | 356          |
| <b>Grade</b>          | II                | 97           | 221          |
|                       | III               | 74           | 244          |
|                       | IV                | 135          | 151          |
| <b>Histology</b>      | Oligodendroglioma | 36           | 169          |
|                       | Oligoastrocytoma  | 73           | 119          |
|                       | Astrocytoma       | 62           | 177          |
|                       | GBM               | 135          | 151          |
| <b>IDH</b>            | Mutant            | 167          | 387          |
|                       | Wildtype          | 139          | 221          |
|                       | NA                | 0            | 8            |
| <b>1p/19q</b>         | Codel             | 63           | 155          |
|                       | Non-codel         | 239          | 457          |
|                       | NA                | 4            | 4            |
| <b>Chemostatus</b>    | Yes               | 173          | 256          |
|                       | No                | 118          | 185          |
|                       | NA                | 15           | 175          |
| <b>Radiostatus</b>    | Yes               | 251          | 382          |
|                       | No                | 44           | 184          |
|                       | NA                | 11           | 50           |

**Supplementary Table S2.** The clinicopathological characteristics of glioma patients in three subtypes identified by selected RNA:m<sup>5</sup>C methyltransferases with the CGGA dataset.

| Characteristics       |                   | MC1       | MC2      | MC3       | P-value           |
|-----------------------|-------------------|-----------|----------|-----------|-------------------|
| <b>Total patients</b> |                   | 104       | 120      | 82        |                   |
| <b>Gender</b>         | Female            | 41        | 38       | 38        | <b>0.104</b>      |
|                       | Male              | 63        | 82       | 44        |                   |
| <b>Age</b>            |                   | 42(17-70) | 47(8-79) | 38(19-61) | <b>&lt;0.0001</b> |
| <b>Grade</b>          | II                | 61        | 7        | 29        | <b>&lt;0.0001</b> |
|                       | III               | 25        | 26       | 23        |                   |
|                       | IV                | 18        | 87       | 30        |                   |
| <b>Histology</b>      | Oligodendroglioma | 26        | 1        | 9         | <b>&lt;0.0001</b> |
|                       | Oligoastrocytoma  | 33        | 18       | 22        |                   |
|                       | Astrocytoma       | 27        | 14       | 21        |                   |
| <b>IDH</b>            | GBM               | 18        | 87       | 30        | <b>&lt;0.0001</b> |
|                       | Mutant            | 70        | 20       | 77        |                   |
|                       | Wildtype          | 34        | 100      | 5         |                   |
| <b>1p19q</b>          | Codel             | 42        | 5        | 16        | <b>&lt;0.0001</b> |
|                       | Non-codel         | 60        | 115      | 64        |                   |
|                       | NA                | 2         | 0        | 2         |                   |
| <b>Chemostatus</b>    | Yes               | 47        | 80       | 46        | <b>0.006</b>      |
|                       | No                | 51        | 35       | 32        |                   |
|                       | NA                | 6         | 5        |           |                   |
| <b>Radiostatus</b>    | Yes               | 88        | 96       | 67        | <b>0.602</b>      |
|                       | No                | 12        | 19       | 13        |                   |
|                       | NA                | 4         | 5        | 2         |                   |

Significance:  $P^* < 0.05$ ,  $P^{**} < 0.01$ ,  $P^{***} < 0.001$ .

**Supplementary Table S3.** The clinicopathological characteristics of glioma patients with low-risk and high-risk groups in CGGA dataset

| Characteristics       |                   | CGGA dataset |           |                   | TCGA dataset |           |                   |
|-----------------------|-------------------|--------------|-----------|-------------------|--------------|-----------|-------------------|
|                       |                   | low-risk     | high-risk | <i>P</i> -value   | low-risk     | high-risk | <i>P</i> -value   |
| <b>Total patients</b> |                   | 153          | 153       |                   | 308          | 308       |                   |
| <b>Gender</b>         | Female            | 62           | 55        | 0.41              | 136          | 125       | <b>0.37</b>       |
|                       | Male              | 91           | 98        |                   | 172          | 183       |                   |
| <b>Age</b>            | >50               | 26           | 59        | <0.0001           | 92           | 168       | <b>&lt;0.0001</b> |
|                       | <=50              | 127          | 94        |                   | 216          | 140       |                   |
| <b>Grade</b>          | II                | 82           | 15        | <b>&lt;0.0001</b> | 178          | 43        | <b>&lt;0.0001</b> |
|                       | III               | 38           | 36        |                   | 119          | 125       |                   |
|                       | IV                | 33           | 102       |                   | 11           | 140       |                   |
| <b>Histology</b>      | Oligodendroglioma | 2            | 34        | <b>&lt;0.0001</b> | 137          | 32        | <b>&lt;0.0001</b> |
|                       | Oligoastrocytoma  | 20           | 53        |                   | 81           | 38        |                   |
|                       | Astrocytoma       | 29           | 33        |                   | 79           | 140       |                   |
|                       | GBM               | 102          | 33        |                   | 11           | 98        |                   |
| <b>IDH</b>            | Mutant            | 112          | 55        | <b>&lt;0.0001</b> | 268          | 119       | <b>&lt;0.0001</b> |
|                       | Wildtype          | 41           | 98        |                   | 36           | 185       |                   |
|                       | NA                | 0            | 0         |                   | 4            | 4         |                   |
| <b>1p/19q</b>         | Codel             | 63           | 0         | <b>&lt;0.0001</b> | 141          | 14        | <b>&lt;0.0001</b> |
|                       | Non-codel         | 88           | 151       |                   | 166          | 291       |                   |
|                       | NA                | 2            | 2         |                   | 1            | 3         |                   |
| <b>Chemostatus</b>    | Yes               | 76           | 97        | <b>0.01</b>       | 128          | 128       | <b>&lt;0.0001</b> |
|                       | No                | 70           | 48        |                   | 151          | 34        |                   |
|                       | NA                | 7            | 8         |                   | 29           | 146       |                   |
| <b>Radiostatus</b>    | Yes               | 129          | 122       | <b>0.3</b>        | 163          | 219       | <b>&lt;0.0001</b> |
|                       | No                | 19           | 25        |                   | 130          | 54        |                   |
|                       | NA                | 5            | 6         |                   | 15           | 35        |                   |

Note: Significance:  $P^* < 0.05$ ,  $P^{**} < 0.01$ ,  $P^{***} < 0.001$ .

**Supplementary Table S4.** The somatic mutation data of seven RNA:m<sup>5</sup>C methyltransferases from the TCGA dataset.

| Symbol       | Gene Id | Chromosome | Variant Classification | Variant Type | Tumor Sample    | Mutation Status |
|--------------|---------|------------|------------------------|--------------|-----------------|-----------------|
| <b>NOP2</b>  | 4839    | chr12      | Missense_Mutation      | SNP          | TCGA-02-2485-01 | Somatic         |
| <b>NSUN2</b> | 54888   | chr5       | Missense_Mutation      | SNP          | TCGA-76-4926-01 | Somatic         |
| <b>NSUN5</b> | 55695   | chr7       | Missense_Mutation      | SNP          | TCGA-DU-A5TR-01 | Somatic         |
| <b>NSUN5</b> | 55695   | chr7       | Translation_Start_Site | SNP          | TCGA-76-4926-01 | Somatic         |
| <b>NSUN5</b> | 55695   | chr7       | Missense_Mutation      | SNP          | TCGA-06-0744-01 | Somatic         |
| <b>NSUN7</b> | 79730   | chr4       | Nonsense_Mutation      | SNP          | TCGA-02-2486-01 | Somatic         |
